# Supplementary material for: Gene Expression Profiling Identifies Downregulation of the Neurotrophin-MAPK Signaling Pathway in Female Diabetic Peripheral Neuropathy Patients
Source: J Diabetes Res. 2017 Aug 16;2017:8103904. doi: 10.1155/2017/8103904 (PMC5576431; doi:10.1155/2017/8103904)
Supplement: Supplementary file 1 — Supplementary Table S1: Gene set lists of three enriched KEGG pathways. [file 8103904.f1.xls]

## Sheet: Sheet1
>	hsa04010:MAPK signaling pathway; Q-value: 1.37574E-03
	Gene_symbol	Description	Entrez_gene	logFC	P.Value
	GADD45G	growth arrest and DNA-damage-inducible, gamma	10912	-1.83392	0.00763624
	DUSP10	dual specificity phosphatase 10	11221	-1.21071	0.0167031
	CHP1	calcineurin-like EF-hand protein 1	11261	-1.06533	0.0375659
	ATF2	activating transcription factor 2	1386	1.50576	0.00559036
	CRK	v-crk sarcoma virus CT10 oncogene homolog (avian)	1398	1.05383	0.0278655
	DDIT3	DNA-damage-inducible transcript 3	1649	-2.3403	0.00840092
	DUSP5	dual specificity phosphatase 5	1847	-1.83663	0.0026961
	DUSP6	dual specificity phosphatase 6	1848	2.13214	4.17704e-05
	DUSP7	dual specificity phosphatase 7	1849	1.11081	0.0136477
	DUSP8	dual specificity phosphatase 8	1850	-1.47019	0.00807405
	ELK1	ELK1, member of ETS oncogene family	2002	-1.18247	0.0016906
	ELK4	ELK4, ETS-domain protein (SRF accessory protein 1)	2005	2.36616	0.000254771
	AKT2	v-akt murine thymoma viral oncogene homolog 2	208	-1.03649	0.000875109
	FGF1	fibroblast growth factor 1 (acidic)	2246	-2.77201	4.39467e-07
	TAB2	TGF-beta activated kinase 1/MAP3K7 binding protein 2	23118	1.54629	0.00601168
	MAPK8IP3	mitogen-activated protein kinase 8 interacting protein 3	23162	-1.07675	0.00195191
	FOS	FBJ murine osteosarcoma viral oncogene homolog	2353	1.65793	0.000244347
	MKNK2	MAP kinase interacting serine/threonine kinase 2	2872	-1.05919	0.000934006
	NR4A1	nuclear receptor subfamily 4, group A, member 1	3164	-1.96307	0.0112503
	HSPA8	heat shock 70kDa protein 8	3312	1.24082	0.000729357
	HSPB1	heat shock 27kDa protein 1	3315	-1.22861	0.000956664
	JUN	jun proto-oncogene	3725	-1.86073	0.0132024
	JUND	jun D proto-oncogene	3727	-1.31992	0.00485891
	MAP3K1	mitogen-activated protein kinase kinase kinase 1, E3 ubiquitin protein ligase	4214	1.9155	0.00464005
	GADD45B	growth arrest and DNA-damage-inducible, beta	4616	-2.19775	0.0039475
	ATF4	activating transcription factor 4 (tax-responsive enhancer element B67)	468	-1.12663	0.00087627
	NFKB2	nuclear factor of kappa light polypeptide gene enhancer in B-cells 2 (p49/p100)	4791	-2.10482	0.00145841
	NTRK2	neurotrophic tyrosine kinase, receptor, type 2	4915	-1.74101	0.00502782
	NLK	nemo-like kinase	51701	1.45225	0.000405926
	PPP3CA	protein phosphatase 3, catalytic subunit, alpha isozyme	5530	1.05682	0.0121864
	PRKCB	protein kinase C, beta	5579	1.64492	0.0028748
	CACNA2D3	calcium channel, voltage-dependent, alpha 2/delta subunit 3	55799	1.22695	0.0202724
	MAPK3	mitogen-activated protein kinase 3	5595	-1.56993	0.0023945
	PRKX	protein kinase, X-linked	5613	1.77313	0.000316425
	RASA1	RAS p21 protein activator (GTPase activating protein) 1	5921	1.06264	0.00126191
	RELA	v-rel reticuloendotheliosis viral oncogene homolog A (avian)	5970	-1.31666	0.00103414
	RELB	v-rel reticuloendotheliosis viral oncogene homolog B	5971	-1.5485	0.00314484
	BDNF	brain-derived neurotrophic factor	627	-2.01025	8.28283e-06
	MAPK12	mitogen-activated protein kinase 12	6300	-1.58444	0.00687739
	MAP2K4	mitogen-activated protein kinase kinase 4	6416	1.01275	0.00195377
	MAP3K7	mitogen-activated protein kinase kinase kinase 7	6885	1.12406	0.0125076
	TGFB2	transforming growth factor, beta 2	7042	-1.10237	0.00121662
	TGFBR1	transforming growth factor, beta receptor 1	7046	-1.13744	0.00811636
	TGFBR2	transforming growth factor, beta receptor II (70/80kDa)	7048	1.15019	0.0176613
	TNF	tumor necrosis factor	7124	-2.27971	0.000224606
	TNFRSF1A	tumor necrosis factor receptor superfamily, member 1A	7132	1.59264	0.00633801
	TRAF2	TNF receptor-associated factor 2	7186	-1.31539	5.09631e-05
	PLA2G6	phospholipase A2, group VI (cytosolic, calcium-independent)	8398	-1.00551	0.00310104
	LAMTOR3	late endosomal/lysosomal adaptor, MAPK and MTOR activator 3	8649	-1.05253	0.0149015
	MAP3K14	mitogen-activated protein kinase kinase kinase 14	9020	-1.08971	0.000214849
	MAPKAPK2	mitogen-activated protein kinase-activated protein kinase 2	9261	-1.83704	3.37803e-05
	MAP4K4	mitogen-activated protein kinase kinase kinase kinase 4	9448	1.00274	0.00961439
	CDC42	cell division cycle 42 (GTP binding protein, 25kDa)	998	-1.16002	0.0107342
>	hsa04621:NOD-like receptor signaling pathway; Q-value: 1.56517E-02
	Gene_symbol	Description	Entrez_gene	logFC	P.Value
	TAB2	TGF-beta activated kinase 1/MAP3K7 binding protein 2	23118	1.54629	0.00601168
	CXCL2	chemokine (C-X-C motif) ligand 2	2920	-2.86829	0.013556
	HSP90AA1	heat shock protein 90kDa alpha (cytosolic), class A member 1	3320	-1.32797	0.000120577
	MEFV	Mediterranean fever	4210	1.37004	0.00520979
	NAIP	NLR family, apoptosis inhibitory protein	4671	1.83176	0.000183605
	NFKBIA	nuclear factor of kappa light polypeptide gene enhancer in B-cells inhibitor, alpha	4792	-1.68862	0.00391813
	NFKBIB	nuclear factor of kappa light polypeptide gene enhancer in B-cells inhibitor, beta	4793	-1.39013	6.67225e-05
	ERBB2IP	erbb2 interacting protein	55914	1.08888	0.00209653
	MAPK3	mitogen-activated protein kinase 3	5595	-1.56993	0.0023945
	RELA	v-rel reticuloendotheliosis viral oncogene homolog A (avian)	5970	-1.31666	0.00103414
	MAPK12	mitogen-activated protein kinase 12	6300	-1.58444	0.00687739
	CCL8	chemokine (C-C motif) ligand 8	6355	-1.15925	0.0186373
	MAP3K7	mitogen-activated protein kinase kinase kinase 7	6885	1.12406	0.0125076
	TNF	tumor necrosis factor	7124	-2.27971	0.000224606
	TNFAIP3	tumor necrosis factor, alpha-induced protein 3	7128	-2.15871	0.0209651
	CASP1	caspase 1, apoptosis-related cysteine peptidase	834	1.54898	0.000304418
	CASP5	caspase 5, apoptosis-related cysteine peptidase	838	-1.13809	0.00398779
	RIPK2	receptor-interacting serine-threonine kinase 2	8767	-1.53978	0.00371206
>	hsa04722:Neurotrophin signaling pathway; Q-value: 2.86772E-02
	Gene_symbol	Description	Entrez_gene	logFC	P.Value
	SH2B2	SH2B adaptor protein 2	10603	-1.5121	0.00524484
	IRAK3	interleukin-1 receptor-associated kinase 3	11213	-1.31099	0.0045998
	CRK	v-crk sarcoma virus CT10 oncogene homolog (avian)	1398	1.05383	0.0278655
	AKT2	v-akt murine thymoma viral oncogene homolog 2	208	-1.03649	0.000875109
	PIK3R5	phosphoinositide-3-kinase, regulatory subunit 5	23533	-1.16035	0.00762359
	GSK3B	glycogen synthase kinase 3 beta	2932	-1.13588	0.00192516
	JUN	jun proto-oncogene	3725	-1.86073	0.0132024
	ARHGDIA	Rho GDP dissociation inhibitor (GDI) alpha	396	-1.66756	8.96507e-05
	MAP3K1	mitogen-activated protein kinase kinase kinase 1, E3 ubiquitin protein ligase	4214	1.9155	0.00464005
	ATF4	activating transcription factor 4 (tax-responsive enhancer element B67)	468	-1.12663	0.00087627
	NFKBIA	nuclear factor of kappa light polypeptide gene enhancer in B-cells inhibitor, alpha	4792	-1.68862	0.00391813
	NFKBIB	nuclear factor of kappa light polypeptide gene enhancer in B-cells inhibitor, beta	4793	-1.39013	6.67225e-05
	NFKBIE	nuclear factor of kappa light polypeptide gene enhancer in B-cells inhibitor, epsilon	4794	-2.11101	0.00481994
	NTRK2	neurotrophic tyrosine kinase, receptor, type 2	4915	-1.74101	0.00502782
	PIK3CB	phosphatidylinositol-4,5-bisphosphate 3-kinase, catalytic subunit beta	5291	1.04211	0.00410829
	MAPK3	mitogen-activated protein kinase 3	5595	-1.56993	0.0023945
	BAD	BCL2-associated agonist of cell death	572	-1.05916	0.0062754
	PTPN11	protein tyrosine phosphatase, non-receptor type 11	5781	1.18083	0.00208074
	BCL2	B-cell CLL/lymphoma 2	596	2.28345	7.51994e-06
	RELA	v-rel reticuloendotheliosis viral oncogene homolog A (avian)	5970	-1.31666	0.00103414
	BDNF	brain-derived neurotrophic factor	627	-2.01025	8.28283e-06
	MAPK12	mitogen-activated protein kinase 12	6300	-1.58444	0.00687739
	YWHAG	tyrosine 3-monooxygenase/tryptophan 5-monooxygenase activation protein, gamma polypeptide	7532	1.3419	5.00651e-05
	CAMK2D	calcium/calmodulin-dependent protein kinase II delta	817	1.42913	0.00105133
	RIPK2	receptor-interacting serine-threonine kinase 2	8767	-1.53978	0.00371206
	MAPKAPK2	mitogen-activated protein kinase-activated protein kinase 2	9261	-1.83704	3.37803e-05
	CDC42	cell division cycle 42 (GTP binding protein, 25kDa)	998	-1.16002	0.0107342
